# Supplementary material for: Structural analogues in herbal medicine ginseng hit a shared target to achieve cumulative bioactivity
Source: PubMed Central journal article supplement (PMC8110997; doi:10.1038/s42003-021-02084-3), 2021-05-10
Supplement: 42003_2021_2084_MOESM1_ESM.pdf [file 42003_2021_2084_MOESM1_ESM.pdf]

## **Supplementary Figures and Tables**

**Structural analogues in herbal medicine ginseng hit a shared target to achieve cumulative bioactivity**

Wei Zhang, Wei-Wei Tao, Jing Zhou, Cheng-Ying Wu, Fang Long, Hong Shen, He Zhu, Qian Mao, Jun Xu<sup>\*</sup>, Song-Lin Li<sup>\*\*</sup>, Qi-Nan Wu<sup>\*\*\*</sup>

**Contents:**

**Supplementary Figures 1-3**

**Supplementary Tables 1-9**

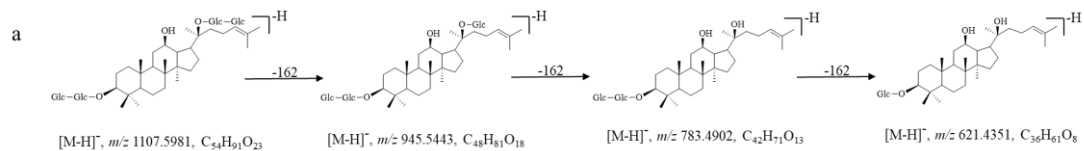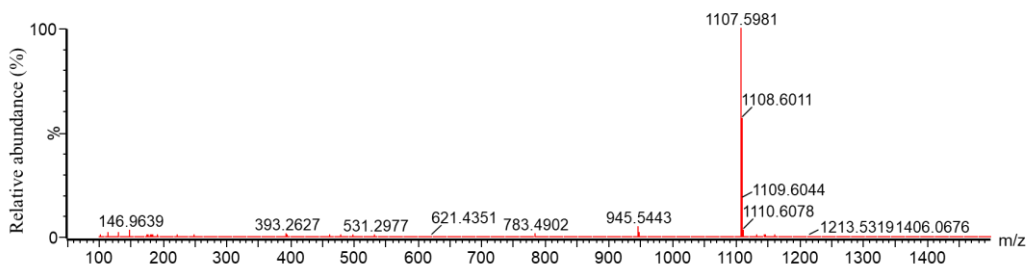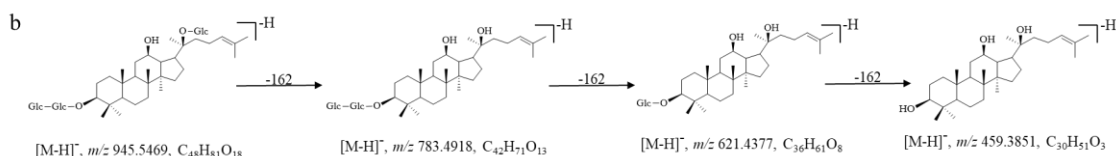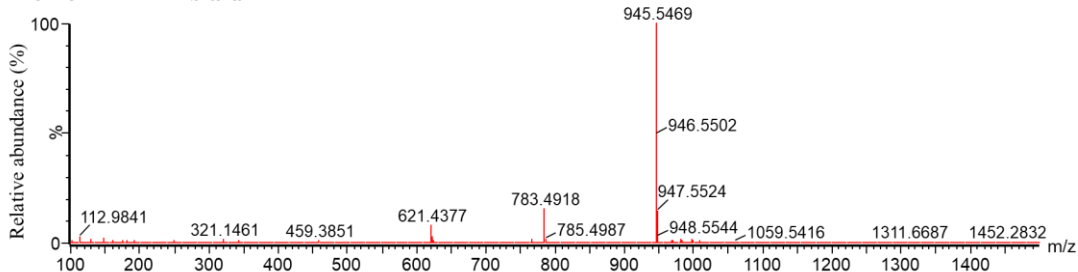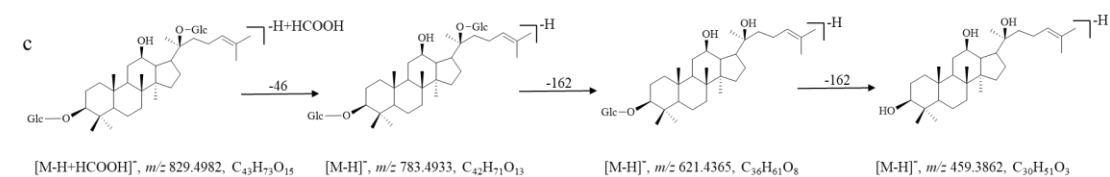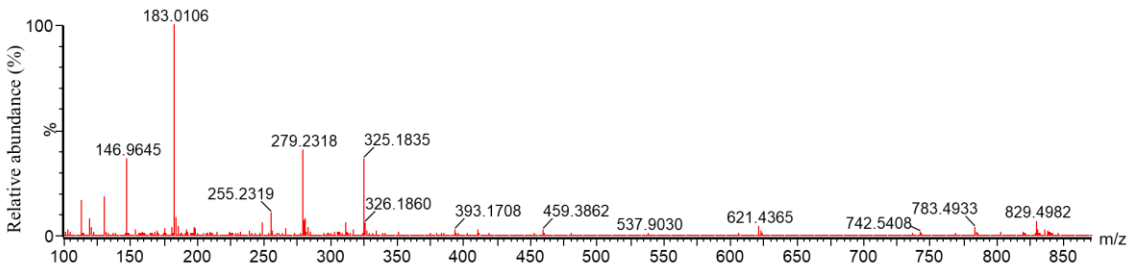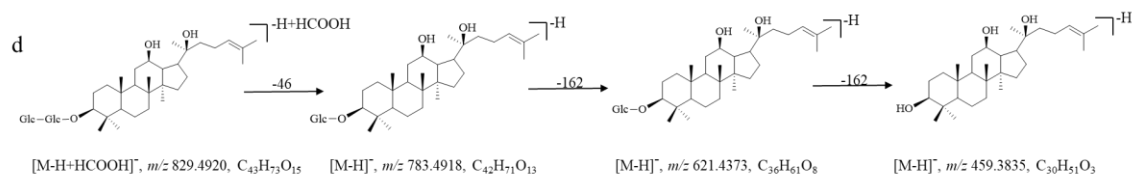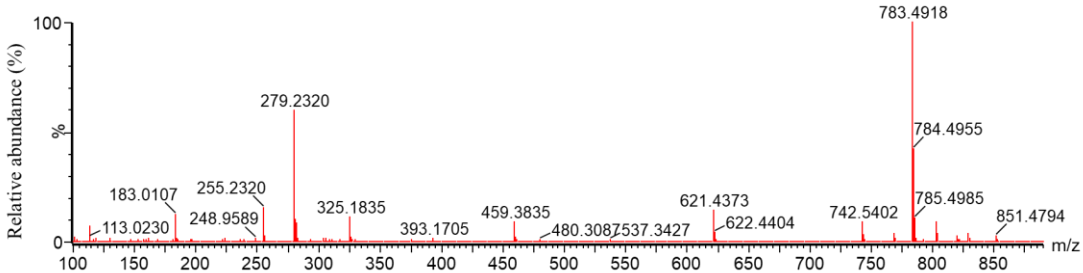

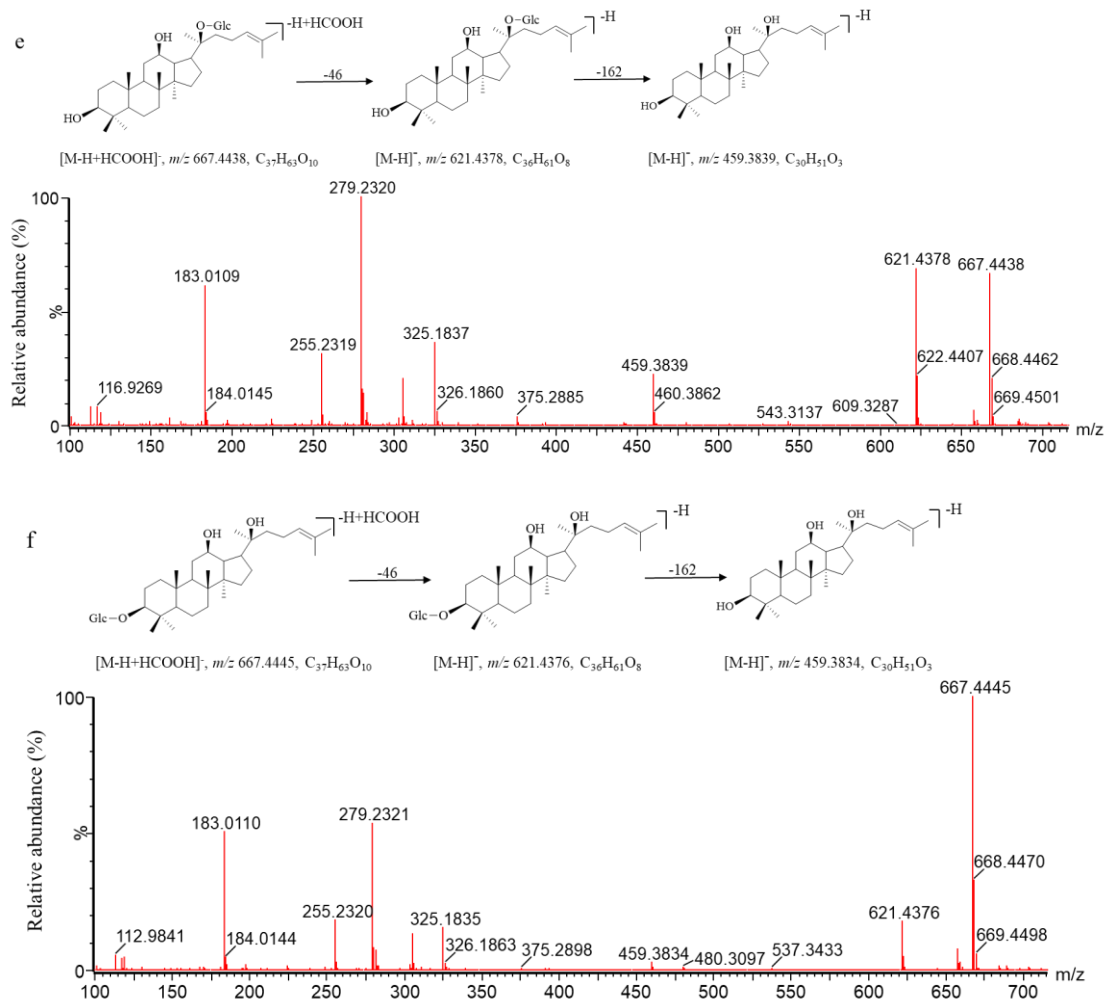

**Supplementary Figure 1. MS/MS spectra and fragmentation pathways of ginsenoside Rb<sub>1</sub> and its main metabolites. a** M0, Rb<sub>1</sub>; **b** M1, Rd; **c** M2, Rg<sub>3</sub>; **d** M3, F<sub>2</sub>; **e** M4, Rh<sub>2</sub>; **f** M5, CK.

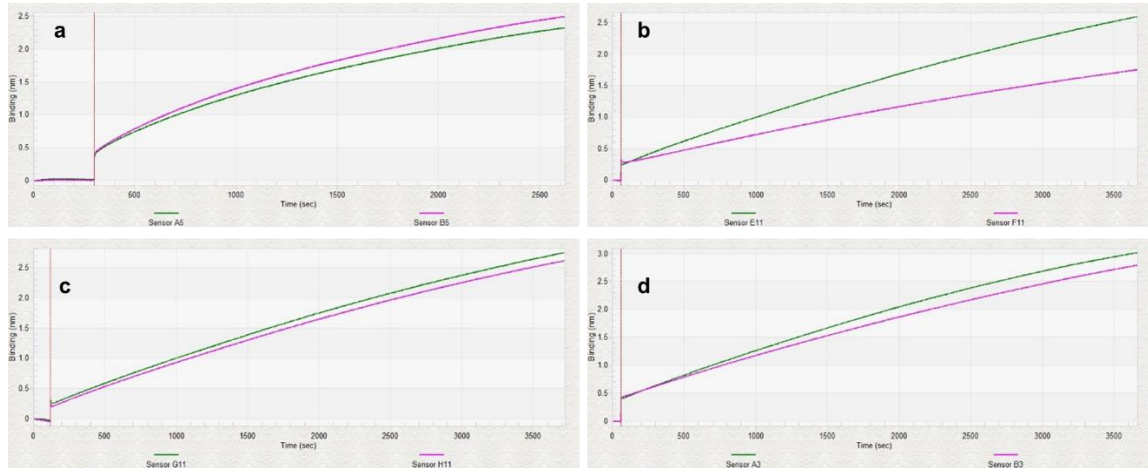

**Supplementary Figure 2. Aligned loading of protein (10  $\mu\text{g}/\text{mL}$ ) immobilized online using Ni-NTA biosensors for the further kinetic assay with ginsenosides. **a** Rb<sub>1</sub>, **b** Rd, **c** F<sub>2</sub>, **d** Rg<sub>3</sub>.**

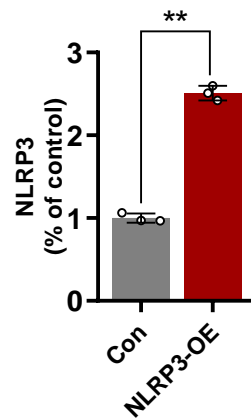

**Supplementary Figure 3. Western blot analysis after macrophage transfection with NLRP3 overexpression lentiviral vectors. All data are expressed as means  $\pm$  SD (n = 3). Compared with Con, \*\*  $p < 0.01$ .**

**Supplementary Table 1. Information of ginsenoside Rb<sub>1</sub> and its intestinal metabolites identified by UPLC-QTOF-MS/MS in negative ion mode**

| No. | Identification  | Formula                                         | RT    | Mean measured mass (Da) | Theoretical exact mass (Da) | Mass accuracy (ppm) | Empirical formula and proposed CID fragment ions                                           |
|-----|-----------------|-------------------------------------------------|-------|-------------------------|-----------------------------|---------------------|--------------------------------------------------------------------------------------------|
| M0  | Rb <sub>1</sub> | C <sub>54</sub> H <sub>92</sub> O <sub>23</sub> | 4.43  | 1153.6039               | 1153.6006                   | 2.9                 | C <sub>55</sub> H <sub>93</sub> O <sub>25</sub> [M-H+HCOOH] <sup>-</sup>                   |
|     |                 |                                                 |       | 1107.5981               | 1107.5951                   | 2.7                 | C <sub>54</sub> H <sub>91</sub> O <sub>23</sub> [M-H] <sup>-</sup>                         |
|     |                 |                                                 |       | 945.5443                | 945.5423                    | 2.1                 | C <sub>48</sub> H <sub>81</sub> O <sub>18</sub> [M-H-(Glc-H <sub>2</sub> O)] <sup>-</sup>  |
|     |                 |                                                 |       | 783.4902                | 783.4985                    | 0.9                 | C <sub>42</sub> H <sub>71</sub> O <sub>13</sub> [M-H-2(Glc-H <sub>2</sub> O)] <sup>-</sup> |
|     |                 |                                                 |       | 621.4351                | 621.4366                    | -2.4                | C <sub>36</sub> H <sub>61</sub> O <sub>8</sub> [M-H-3(Glc-H <sub>2</sub> O)] <sup>-</sup>  |
| M1  | Rd              | C <sub>48</sub> H <sub>82</sub> O <sub>18</sub> | 5.59  | 991.5515                | 991.5478                    | 0.6                 | C <sub>49</sub> H <sub>83</sub> O <sub>20</sub> [M-H+HCOOH] <sup>-</sup>                   |
|     |                 |                                                 |       | 945.5469                | 945.5423                    | 1.4                 | C <sub>48</sub> H <sub>81</sub> O <sub>18</sub> [M-H] <sup>-</sup>                         |
|     |                 |                                                 |       | 783.4918                | 783.4895                    | 3.7                 | C <sub>42</sub> H <sub>71</sub> O <sub>13</sub> [M-H-(Glc-H <sub>2</sub> O)] <sup>-</sup>  |
|     |                 |                                                 |       | 621.4377                | 621.4366                    | 2.9                 | C <sub>36</sub> H <sub>61</sub> O <sub>8</sub> [M-H-2(Glc-H <sub>2</sub> O)] <sup>-</sup>  |
|     |                 |                                                 |       | 459.3851                | 459.3838                    | 2.8                 | C <sub>30</sub> H <sub>51</sub> O <sub>3</sub> [M-H-3(Glc-H <sub>2</sub> O)] <sup>-</sup>  |
| M2  | F <sub>2</sub>  | C <sub>42</sub> H <sub>72</sub> O <sub>13</sub> | 11.72 | 829.4982                | 829.4949                    | 4.0                 | C <sub>43</sub> H <sub>73</sub> O <sub>15</sub> [M-H+HCOOH] <sup>-</sup>                   |
|     |                 |                                                 |       | 783.4933                | 783.4895                    | 4.9                 | C <sub>42</sub> H <sub>71</sub> O <sub>12</sub> [M-H] <sup>-</sup>                         |
|     |                 |                                                 |       | 621.4365                | 621.4366                    | -0.2                | C <sub>36</sub> H <sub>61</sub> O <sub>8</sub> [M-H-(Glc-H <sub>2</sub> O)] <sup>-</sup>   |
|     |                 |                                                 |       | 459.3862                | 459.3838                    | 5.2                 | C <sub>30</sub> H <sub>51</sub> O <sub>3</sub> [M-H-2(Glc-H <sub>2</sub> O)] <sup>-</sup>  |
| M3  | Rg <sub>3</sub> | C <sub>42</sub> H <sub>72</sub> O <sub>13</sub> | 11.85 | 829.4920                | 829.4949                    | -0.3                | C <sub>43</sub> H <sub>73</sub> O <sub>15</sub> [M-H+HCOOH] <sup>-</sup>                   |
|     |                 |                                                 |       | 783.4918                | 783.4895                    | 2.9                 | C <sub>42</sub> H <sub>71</sub> O <sub>13</sub> [M-H] <sup>-</sup>                         |
|     |                 |                                                 |       | 621.4373                | 621.4366                    | 1.1                 | C <sub>36</sub> H <sub>61</sub> O <sub>8</sub> [M-H-(Glc-H <sub>2</sub> O)] <sup>-</sup>   |
|     |                 |                                                 |       | 459.3835                | 459.3838                    | -0.7                | C <sub>30</sub> H <sub>51</sub> O <sub>3</sub> [M-H-2(Glc-H <sub>2</sub> O)] <sup>-</sup>  |
| M4  | CK              | C <sub>36</sub> H <sub>62</sub> O <sub>8</sub>  | 12.30 | 667.4438                | 667.4421                    | 2.5                 | C <sub>37</sub> H <sub>63</sub> O <sub>10</sub> [M-H+HCOOH] <sup>-</sup>                   |
|     |                 |                                                 |       | 621.4378                | 621.4366                    | 1.9                 | C <sub>36</sub> H <sub>61</sub> O <sub>8</sub> [M-H] <sup>-</sup>                          |
|     |                 |                                                 |       | 459.3839                | 459.3838                    | 0.2                 | C <sub>30</sub> H <sub>51</sub> O <sub>3</sub> [M-H-(Glc-H <sub>2</sub> O)] <sup>-</sup>   |
| M5  | Rh <sub>2</sub> | C <sub>36</sub> H <sub>62</sub> O <sub>8</sub>  | 12.37 | 667.4445                | 667.4421                    | 3.6                 | C <sub>37</sub> H <sub>63</sub> O <sub>10</sub> [M-H+HCOOH] <sup>-</sup>                   |
|     |                 |                                                 |       | 621.4376                | 621.4366                    | 1.6                 | C <sub>36</sub> H <sub>61</sub> O <sub>8</sub> [M-H] <sup>-</sup>                          |
|     |                 |                                                 |       | 459.3834                | 459.3838                    | -0.9                | C <sub>30</sub> H <sub>51</sub> O <sub>3</sub> [M-H-(Glc-H <sub>2</sub> O)] <sup>-</sup>   |

Note: RT, the retention time of ginsenoside Rb<sub>1</sub> and its metabolites. Glc, β-D-glucopyranosyl.

**Supplementary Table 2. Target information related to immunomodulatory activity of ginsenosides Rb<sub>1</sub>, Rd, Rg<sub>3</sub> and F<sub>2</sub>**

| Number | Protein name                                       | Gene name       | Uniprot ID | Species      |
|--------|----------------------------------------------------|-----------------|------------|--------------|
| 1      | NACHT, LRR and PYD domains-containing protein 3    | NLRP3           | Q8R4B8     | Mus musculus |
| 2      | Signal transducer and activator of transcription 3 | Stat3           | P42227     | Mus musculus |
| 3      | RAC-alpha serine/threonine-protein kinase          | AKT1            | P31750     | Mus musculus |
| 4      | Androgen Receptor                                  | AR              | P19091     | Mus musculus |
| 5      | Caspase-3                                          | CASP3           | P70677     | Mus musculus |
| 6      | Caspase-8                                          | CASP8           | O89110     | Mus musculus |
| 7      | Caspase-9                                          | CASP9           | Q8C3Q9     | Mus musculus |
| 8      | Cyclin-dependent kinase 1 (by homology)            | CDK1            | P11440     | Mus musculus |
| 9      | Fibroblast growth factor 1                         | FGF1            | P61148     | Mus musculus |
| 10     | Fibroblast growth factor 2                         | FGF2            | P15655     | Mus musculus |
| 11     | Proheparin-binding EGF-like growth factor          | HBEGF           | Q06186     | Mus musculus |
| 12     | Histone deacetylase 6                              | HDAC6           | Q9Z2V5     | Mus musculus |
| 13     | Histone deacetylase 1                              | HDAC1           | O09106     | Mus musculus |
| 14     | Histone deacetylase 8                              | HDAC8           | Q8VH37     | Mus musculus |
| 15     | Heat shock protein HSP 90-alpha (by homology)      | HSP90AA1        | P07901     | Mus musculus |
| 16     | Interleukin-2                                      | IL-2            | Q08867     | Mus musculus |
| 17     | Interleukin-6                                      | IL-6            | P22272     | Mus musculus |
| 18     | Interleukin-1 $\beta$                              | IL-1 $\beta$    | P10749     | Mus musculus |
| 19     | Lysophosphatidic acid receptor 1                   | LPAR1           | P61793     | Mus musculus |
| 20     | Mitogen-activated protein kinase 1                 | MAPK1           | P63085     | Mus musculus |
| 21     | Mitogen-activated protein kinase 3                 | MAPK3           | Q63844     | Mus musculus |
| 22     | Matrix metalloproteinase 9                         | MMP9            | P52176     | Mus musculus |
| 23     | Nitric oxide synthase, inducible                   | NOS2            | P29477     | Mus musculus |
| 24     | BDNF/NT-3 growth factors receptor                  | NTRK2           | P15209     | Mus musculus |
| 25     | Platelet-activating factor receptor                | PTAFR           | Q62035     | Mus musculus |
| 26     | Nuclear receptor ROR-gamma                         | RORC            | P51450     | Mus musculus |
| 27     | Tumor necrosis factor (TNF)                        | TNF             | P06804     | Mus musculus |
| 28     | NAD-dependent deacetylase sirtuin-1                | SIRT1           | Q923E4     | Mus musculus |
| 29     | Nuclear factor NF- $\kappa$ B (NF- $\kappa$ B)     | NF- $\kappa$ B1 | P25799     | Mus musculus |

**Supplementary Table 3. Topological features of the compound-target-pathway network**

| Parameters                 | Numerical value | Parameters            | Numerical value |
|----------------------------|-----------------|-----------------------|-----------------|
| Clustering coefficient     | 0               | Number of nodes       | 42              |
| Connected components       | 1               | Network density       | 0.141           |
| Network diameter           | 4               | Network heterogeneity | 0.717           |
| Network radius             | 3               | Isolated nodes        | 0               |
| Network centralization     | 0.351           | Number of self-loops  | 0               |
| Shortest paths             | 1640(100%)      | Multi-edge node pairs | 0               |
| Characteristic path length | 2.337           | Analysis time (sec)   | 0.017           |
| Avg. number of neighbors   | 5.659           |                       |                 |

**Supplementary Table 4. Topological features of the crucial shared targets**

| Number | Target name | Degree | Closeness Centrality | Betweenness Centrality |
|--------|-------------|--------|----------------------|------------------------|
| 1      | NLRP3       | 11     | 0.10468151           | 0.56338028             |
| 2      | AKT1        | 10     | 0.08971125           | 0.53834951             |
| 3      | MAPK1       | 9      | 0.04140534           | 0.44943820             |
| 4      | TNF         | 8      | 0.07166097           | 0.51948052             |
| 5      | HSP90AA1    | 6      | 0.01743861           | 0.42105263             |
| 6      | MMP9        | 6      | 0.03105904           | 0.49382716             |
| 7      | MAPK3       | 6      | 0.01676439           | 0.42105263             |

**Supplementary Table 5. Docked interaction analysis between ginsenosides****Rb<sub>1</sub>, Rd, Rg<sub>3</sub>, F<sub>2</sub> with NLRP3**

| Ligand name     | Docking score(kcal/mol) | Number of H-bonds | Active site residues | Number of Interacting bonds |
|-----------------|-------------------------|-------------------|----------------------|-----------------------------|
| Rb <sub>1</sub> | -9.28                   | 1                 | THR167               | 1                           |
| Rd              | -10.95                  | 3                 | ARG168               | 1                           |
|                 |                         |                   | ARG165               | 1                           |
|                 |                         |                   | LYS375               | 1                           |
| Rg <sub>3</sub> | -12.33                  | 2                 | PHE408               | 1                           |
|                 |                         |                   | TYR441               | 1                           |
| F <sub>2</sub>  | -13.64                  | 1                 | TYR379               | 1                           |

**Supplementary Table 6. Kinetic parameters of interaction between****ginsenosides Rb<sub>1</sub>, Rd, Rg<sub>3</sub>, F<sub>2</sub> with NLRP3**

| Compounds       | $K_D$ (M) | $K_D$ error | $k_{on}$ (1/Ms) | $k_{on}$ error | $k_{dis}$ (1/s) | $k_{dis}$ error | Full $R^2$ |
|-----------------|-----------|-------------|-----------------|----------------|-----------------|-----------------|------------|
| Rb <sub>1</sub> | 9.96E-05  | 1.19E-05    | 1.34E+03        | 1.17E+02       | 1.34E-01        | 1.09E-02        | 0.8567     |
| Rd              | 5.01E-05  | 2.93E-06    | 1.48E+03        | 6.59E+01       | 7.39E-02        | 2.78E-03        | 0.9061     |
| Rg <sub>3</sub> | 9.61E-06  | 1.75E-06    | 1.77E+04        | 2.39E+03       | 1.70E-01        | 2.07E-02        | 0.8388     |
| F <sub>2</sub>  | 6.16E-05  | 8.01E-06    | 3.61E+03        | 3.45E+02       | 3.45E+02        | 1.96E-02        | 0.8615     |



**Supplementary Table 7. Mass spectrometry conditions for pharmacokinetic analysis**

| Compounds       | Ion channels | Ion mode | Ion transition ( $m/z \rightarrow m/z$ ) | Taper hole voltage (V) | Cone colliding energy (V) | Retention time (min) | Time period (min) |
|-----------------|--------------|----------|------------------------------------------|------------------------|---------------------------|----------------------|-------------------|
| Digoxin         | I            | ESI      | 803.7→283.5                              | 70                     | 50                        | 4.02                 | 0-7               |
| Rb <sub>1</sub> |              |          | 1131.9→365.3                             | 80                     | 60                        | 4.73                 |                   |
| Rd              | II           |          | 970.0→789.6                              | 70                     | 50                        | 6.09                 | 7-15.5            |
| F <sub>2</sub>  |              |          | 807.8→203.2                              | 70                     | 40                        | 8.36                 |                   |
| Rg <sub>3</sub> |              |          | 808.0→365.2                              | 85                     | 50                        | 9.35                 |                   |
| Rh <sub>2</sub> |              |          | 621.3→161.1                              | 80                     | 50                        | 12.10                |                   |
| CK              |              |          | 645.7→203.2                              | 70                     | 40                        | 12.25                |                   |

**Supplementary Table 8. The primer sequences for RT-qPCR**

| Gene           | Forward                | Reverse               |
|----------------|------------------------|-----------------------|
| iNOS           | CATGCTACTGGAGGTGGGTG   | CATTGATCTCCGTGACAGCC  |
| IL-1 $\beta$   | AGGACATGAGCACCTTCTTTTC | ACGTCACACACCAGCAGGTTA |
| TNF- $\alpha$  | TGCCTATGTCTCAGCCTCTTC  | GAGGCCATTTGGGAACCTTCT |
| IL-4           | GTTCTTCGTTGCTGTGAGGAC  | TGTACCAGGAGCCATATCCAC |
| IL-10          | CAGTCGGCCAGAGCCACAT    | CTTGGCAACCCAAGTAACCCT |
| $\beta$ -actin | AGTGTGACGTTGACATCCGT   | GCAGCTCAGTAACAGTCCGC  |

**Supplementary Table 9. Measurement parameter for kinetic assay using biolayer interferometry**

| Compounds       | Step | Step name    | Time(s) | Shake speed(rpm) | Step type       |
|-----------------|------|--------------|---------|------------------|-----------------|
| Rb <sub>1</sub> | 1    | Baseline1    | 60      | 1000             | Equilibration   |
|                 | 2    | Loading      | 3600    | 1000             | Protein loading |
|                 | 3    | Baseline2    | 60      | 1000             | Baseline        |
|                 | 4    | Association  | 600     | 1000             | Association     |
|                 | 5    | Dissociation | 600     | 1000             | Dissociation    |
| Rd              | 1    | Baseline1    | 60      | 1000             | Equilibration   |
|                 | 2    | Loading      | 3600    | 1000             | Protein loading |
|                 | 3    | Baseline2    | 60      | 1000             | Baseline        |
|                 | 4    | Association  | 300     | 1000             | Association     |
|                 | 5    | Dissociation | 300     | 1000             | Dissociation    |
| Rg <sub>3</sub> | 1    | Baseline1    | 60      | 1000             | Equilibration   |
|                 | 2    | Loading      | 3600    | 1000             | Protein loading |
|                 | 3    | Baseline2    | 60      | 1000             | Baseline        |
|                 | 4    | Association  | 240     | 1000             | Association     |
|                 | 5    | Dissociation | 240     | 1000             | Dissociation    |
| F <sub>2</sub>  | 1    | Baseline1    | 60      | 1000             | Equilibration   |
|                 | 2    | Loading      | 3600    | 1000             | Protein loading |
|                 | 3    | Baseline2    | 60      | 1000             | Baseline        |
|                 | 4    | Association  | 180     | 1000             | Association     |
|                 | 5    | Dissociation | 180     | 1000             | Dissociation    |
