# Supplementary material for: Structural analogues in herbal medicine ginseng hit a shared target to achieve cumulative bioactivity
Source: PubMed Central journal article supplement (PMC8110997; doi:10.1038/s42003-021-02084-3), 2021-05-10
Supplement: 42003_2021_2084_MOESM2_ESM.pdf [file 42003_2021_2084_MOESM2_ESM.pdf]

## **Description of Additional Supplementary Files**

**File Name:** Supplementary Data 1

**Description:** Source data file for all graphs presented in the paper.
